# Supplementary material for: Re-assessing viologens for modern bio-electrocatalysis
Source: Royal Society of Chemistry journal article supplement (doi:10.1039/d4sc02431a), 2024-01-01
Supplement: d4sc02431a1.pdf [file d4sc02431a1.pdf]

## SUPPLEMENTARY INFORMATION

### Re-assessing viologens for modern bio-electrocatalysis

Desmond Ato Koomson<sup>1</sup>, Jake H. Nicholson<sup>1</sup>, Alex P. S. Brogan<sup>1,\*</sup>, and Leigh Aldous<sup>1,\*</sup>

1. Department of Chemistry, Britannia House, King's College London, London SE1 1DB, UK

**Supplementary Table 1.** Materials and conditions for synthesis of viologen library.

| Viologens | Reagents                               | Mass/<br>Volume | Solvents                 | Temperature<br>(°C) | Duration  | Observation                                       |
|-----------|----------------------------------------|-----------------|--------------------------|---------------------|-----------|---------------------------------------------------|
| 1-MBP     | 4,4'-bipyridine                        | 5 g             | Ethyl Acetate<br>(50 mL) | 4                   | 1 Month   | Orange precipitate                                |
|           | Iodomethane                            | 1.196 mL        |                          |                     |           |                                                   |
| PV1       | 4,4'-bipyridine                        | 1 g             | ACN (10 mL)              | 60                  | 24 hours  | Colourless solution                               |
|           | 1-Chloropropane                        | 1.691 mL        | DMF (50 mL)              | 120                 | 120 hours | Crystal yellow solution                           |
| PV 2      | 4,4'-bipyridine                        | 1 g             | ACN (50 mL)              | 70                  | 210 hours | Red precipitates                                  |
|           | Iodopropane                            | 1.873 mL        |                          |                     |           |                                                   |
| BuV       | 4,4'-bipyridine                        | 1 g             | ACN (50 mL)              | 60                  | 336 hours | Yellow precipitates                               |
|           | 1-Bromobutane                          | 2.763 mL        |                          |                     |           |                                                   |
| AcV       | 4,4'-bipyridine                        | 1 g             | ACN (75 mL)              | 90                  | 22 hours  | Crystal brown solution<br>with brown precipitates |
|           | Bromoacetic acid                       | 2.669 g         |                          |                     |           |                                                   |
| MAcV      | Iodoacetic acid                        | 0.8799 g        | ACN (65 mL)              | 90                  | 145 hours | Deep orange<br>precipitates                       |
|           | 1-MBP                                  | 1.4106 g        |                          |                     |           |                                                   |
| EtOHV     | 4,4'-bipyridine                        | 1 g             | ACN (50 mL)              | 60                  | 120 hours | White precipitates                                |
|           | 2-Bromoethanol                         | 1.588 mL        | DMF (65 mL)              | 120                 | 96 hours  | Cream precipitates                                |
| POHV      | 4,4'-bipyridine                        | 1 g             | DMF (95 mL)              | 120                 | 410 hours | Brown precipitates                                |
|           | 3-Bromo-1-<br>propanol                 | 2026.53<br>mL   |                          |                     |           |                                                   |
| EtAmV     | 4,4'-bipyridine                        | 1 g             | DMF (70 mL)              | 120                 | 168 hours | Brown precipitate<br>formation                    |
|           | 2-<br>Bromoethylamine<br>hydrobromide  | 3.936 g         |                          |                     |           |                                                   |
| PAmV      | 4,4'-bipyridine                        | 1 g             | DMF (95 mL)              | 120                 | 550 hours | Light brown precipitate<br>formation              |
|           | 2-<br>Bromopropylamine<br>hydrobromide | 4.205 g         |                          |                     |           |                                                   |

|        |                                |          |             |    |           |                    |
|--------|--------------------------------|----------|-------------|----|-----------|--------------------|
| MEtAmV | 1-MBP                          | 1.1393 g | ACN (50 mL) | 90 | 117 hours | Orange precipitate |
|        | 2-Bromoethylamine hydrobromide | 1.566 g  |             |    |           |                    |

**Supplementary Table 2.**  $^1\text{H}$  NMR (400 MHz) characterisation of viologen library.

| Viologens                | Proton (s) | Multiplicity | Chemical shift $\delta$ (ppm) | Solvent             |
|--------------------------|------------|--------------|-------------------------------|---------------------|
| Methyl Viologen (MeV)    | 2H         | d            | 9.0                           | D <sub>2</sub> O    |
|                          | 2H         | d            | 8.46                          |                     |
|                          | 3H         | s            | 4.44                          |                     |
| Ethyl Viologen (EtV)     | 2H         | d            | 9.37                          | DMSO-d <sub>6</sub> |
|                          | 2H         | d            | 8.76                          |                     |
|                          | 2H         | q            | 4.73                          |                     |
|                          | 3H         | t            | 1.67                          |                     |
| Propyl Viologen (PV)     | 2H         | d            | 9.51                          | DMSO-d <sub>6</sub> |
|                          | 2H         | d            | 8.90                          |                     |
|                          | 2H         | t            | 4.74                          |                     |
|                          | 2H         | sex          | 2.03                          |                     |
|                          | 3H         | t            | 0.97                          |                     |
| Butyl Viologen (BuV)     | 2H         | d            | 9.52                          | DMSO-d <sub>6</sub> |
|                          | 2H         | d            | 8.88                          |                     |
|                          | 2H         | t            | 4.77                          |                     |
|                          | 2H         | quin         | 1.97                          |                     |
|                          | 2H         | q            | 1.32                          |                     |
|                          | 3H         | t            | 0.91                          |                     |
| Benzyl Viologen (BzV)    | 2H         | d            | 9.11                          | D <sub>2</sub> O    |
|                          | 2H         | d            | 8.48                          |                     |
|                          | 2H         | m            | 7.52                          |                     |
|                          | 3H         | s            | 5.84                          |                     |
| Ethanol Viologen (EtOHV) | 2H         | d            | 9.08                          | D <sub>2</sub> O    |
|                          | 2H         | d            | 8.51                          |                     |
|                          | 2H         | t            | 4.82                          |                     |
|                          | 2H         | t            | 4.11                          |                     |
| Propanol Viologen (POHV) | 2H         | d            | 9.10                          | D <sub>2</sub> O    |
|                          | 2H         | d            | 8.50                          |                     |
|                          | 2H         | t            | 4.80                          |                     |
|                          | 2H         | t            | 3.66                          |                     |
|                          | 1H         | s            | 2.66                          |                     |
|                          | 2H         | quin         | 2.27                          |                     |
| Acetate Viologen (AcV)   | 2H         | d            | 9.02                          | D <sub>2</sub> O    |
|                          | 2H         | d            | 8.49                          |                     |

|                                   |    |      |      |                  |
|-----------------------------------|----|------|------|------------------|
|                                   | 2H | s    | 4.48 |                  |
| Methyl Acetate Viologen<br>(MAcV) | 2H | d    | 9.33 | D <sub>2</sub> O |
|                                   | 2H | d    | 8.82 |                  |
|                                   | 2H | s    | 3.39 |                  |
|                                   | 3H | s    | 2.52 |                  |
| Ethyl Amine Viologen<br>(EtAmV)   | 2H | d    | 9.20 | D <sub>2</sub> O |
|                                   | 2H | d    | 8.60 |                  |
|                                   | 2H | t    | 5.06 |                  |
|                                   | 2H | t    | 3.73 |                  |
|                                   | 2H | s    | 1.97 |                  |
| Propyl Amine Viologen<br>(PAmV)   | 2H | d    | 9.13 | D <sub>2</sub> O |
|                                   | 2H | d    | 8.56 |                  |
|                                   | 2H | t    | 4.81 |                  |
|                                   | 2H | t    | 3.15 |                  |
|                                   | 3H | s    | 2.65 |                  |
|                                   | 2H | quin | 2.45 |                  |
| Methyl Amine Viologen<br>(MEtAmV) | 2H | d    | 9.18 | D <sub>2</sub> O |
|                                   | 2H | d    | 9.01 |                  |
|                                   | 2H | d    | 8.61 |                  |
|                                   | 2H | d    | 8.48 |                  |
|                                   | 2H | t    | 5.07 |                  |
|                                   | 3H | s    | 4.46 |                  |
|                                   | 2H | t    | 3.75 |                  |

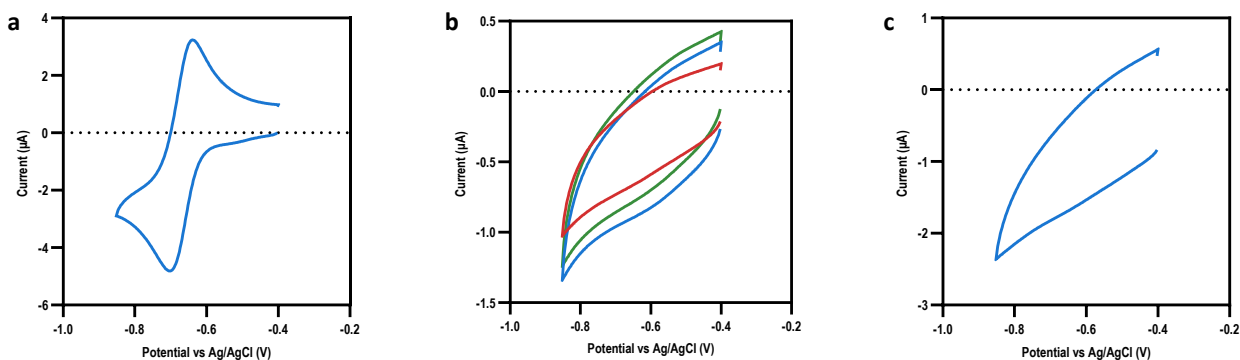

**Supplementary Figure 1.** Cyclic Voltammograms showing no bio-electrocatalytic activity: a – MeV and GSSG; b – GSSG only (red), GR only (green), and GSSG and GR (blue); c – Tris/KCl only.

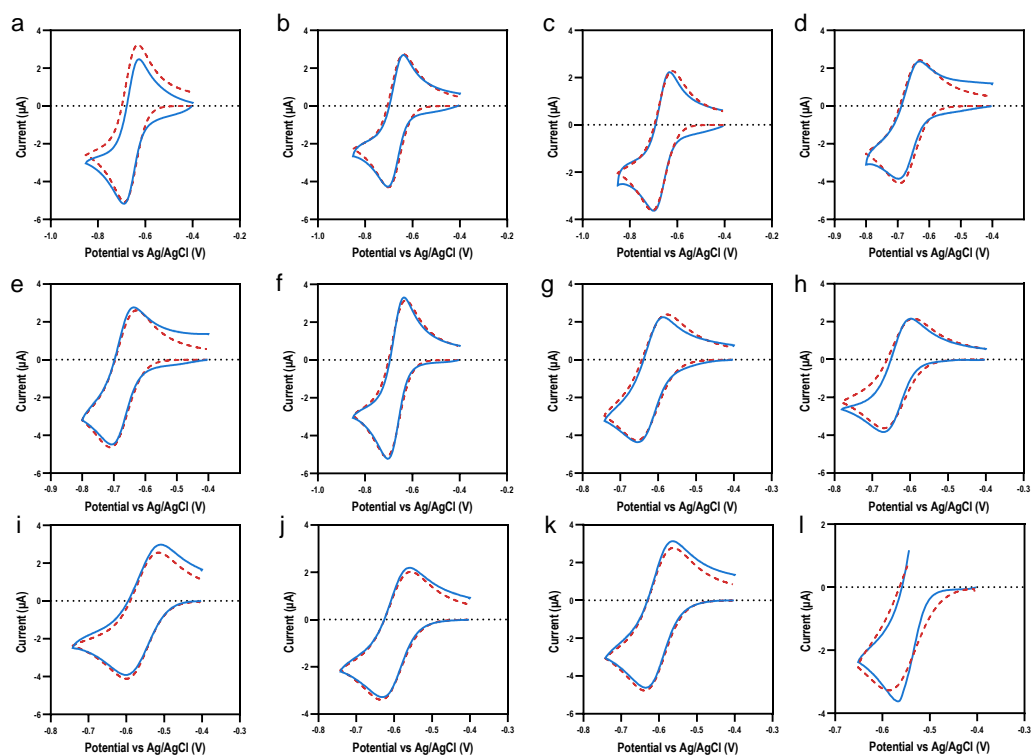

**Supplementary Figure 2.** First redox cyclic voltammograms (solid blue line) of viologens with their corresponding simulated fits (dotted red line): a – MeV; b – EtV; c – PV; d – BuV; e – AcV; f – MacV; g – EtOHV; h – POHV; i – EtAmV; j – PamV; k – MetAmV; and l – BzV.

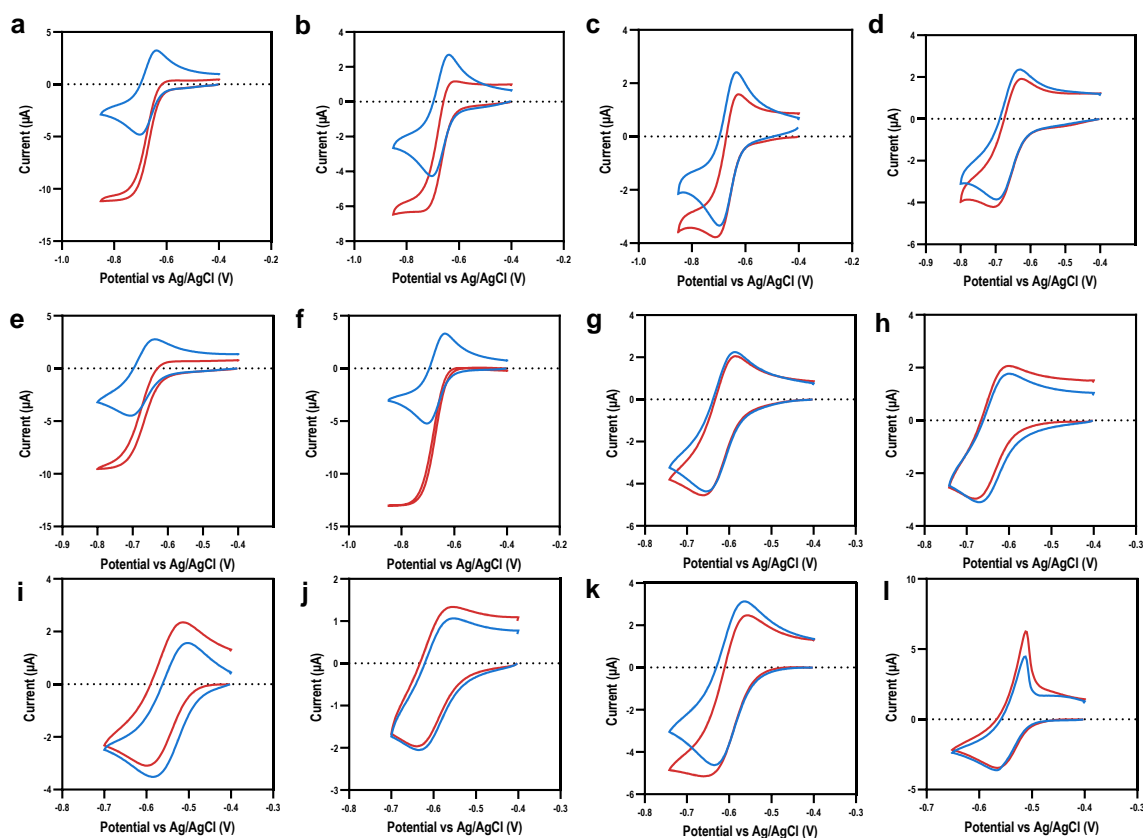

**Supplementary Figure 3.** Cyclic voltammograms showing viologens at  $E_{red,1}$  with GSSG in the presence (red) or absence (blue) of GR for: a – MeV; b – EtV; c – PV; d – BuV; e – AcV; f – MacV; g – EtOHV; h – POHV; i – EtAmV; j – PamV; k – MetAmV; and l – BzV

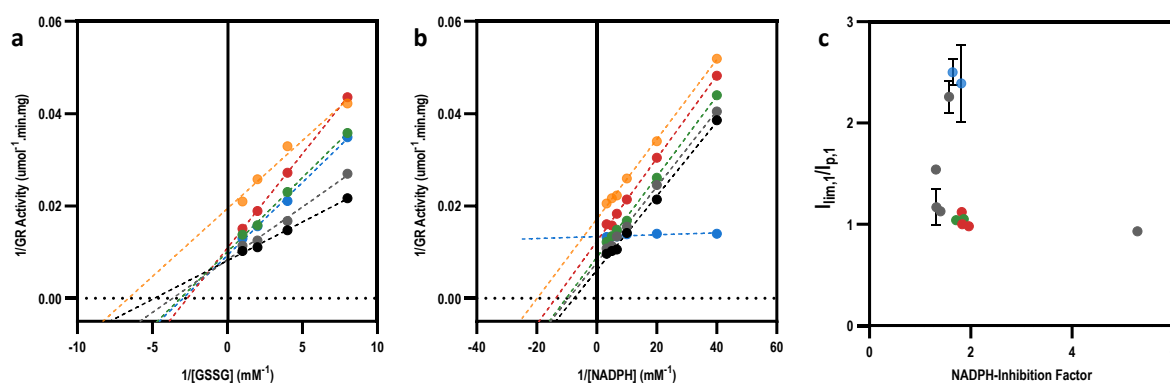

**Supplementary Figure 4.** a – Lineweaver-Burk plot showing inhibition of GSSG at GR active site in presence of viologens: uninhibited control (black), MeV (grey), BzV (orange), EtOHV (green), EtAmV (red), and AcV (blue); b – Lineweaver-Burk plot showing inhibition of NADPH at GR active site in presence of viologens: uninhibited control (black), MeV (grey), BzV (orange), EtOHV (green), EtAmV (red), and AcV (blue); c –  $I_{lim,1}/I_{p,1}$  versus NADPH-inhibition factor of the viologens.

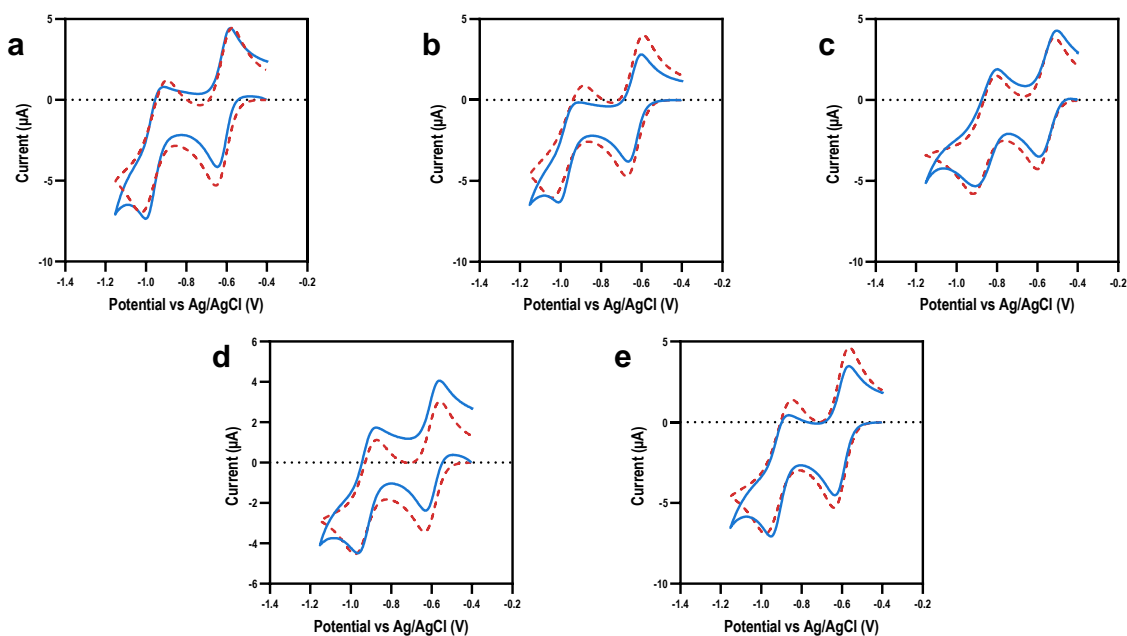

**Supplementary Figure 5.** Second redox cyclic voltammograms (solid blue line) of viologens with their corresponding simulated fits (dotted red line): a – EtOHV; b – POHV; c – EtAmV; d – PamV; e – MetAmV.

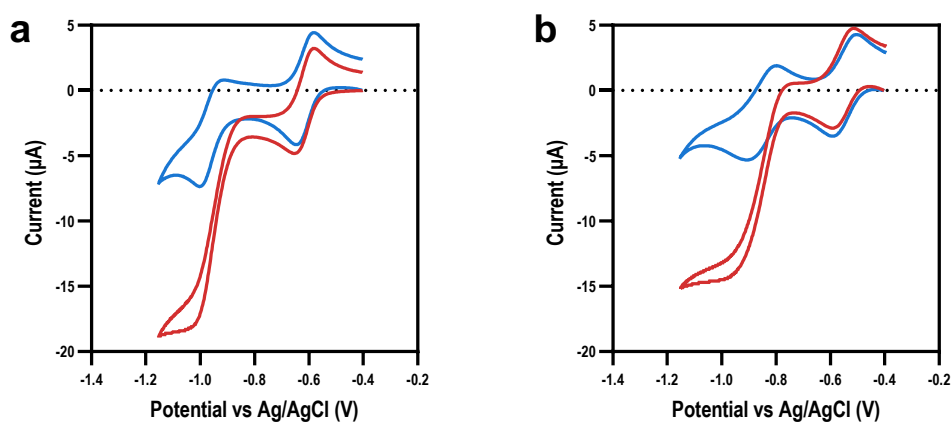

**Supplementary Figure 6.** Cyclic voltammograms showing polar and positively charged viologens at  $E_{red,2}$  with GSSG in the presence (red) or absence (blue) of GR: a – Polar viologen (EtOHV); and b – Positively charged viologen (EtAmV).

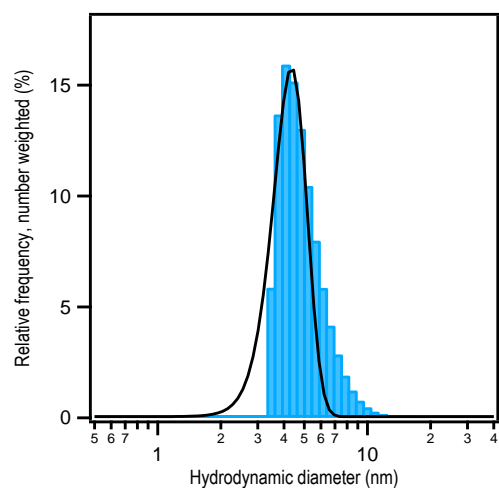

**Supplementary Figure 7.** Plot of number weight particle size distribution against hydrodynamic diameter, as collected by dynamic light scattering, for glutathione reductase in water (data fitted with Gaussian distribution, black, to determine average diameter).

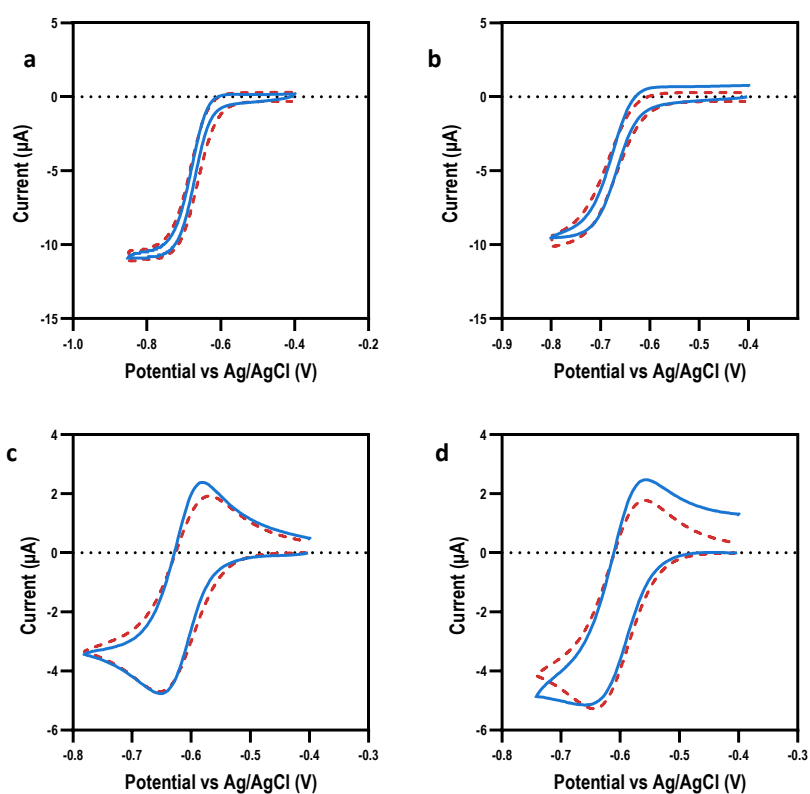

**Supplementary Figure 8.** First redox cyclic voltammograms (solid blue line) showing bio-electrocatalysis with their corresponding simulated fits (dotted red line): a – MeV; b – AcV; c – EtOHV; and d – MetAmV.

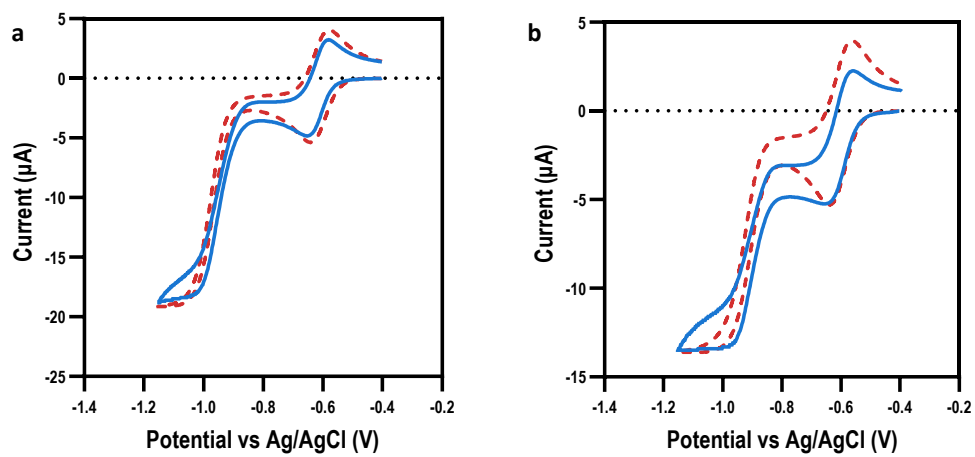

**Supplementary Figure 9.** Second redox cyclic voltammograms (solid blue line) showing bio-electrocatalysis with their corresponding simulated fits (dotted red line): a – EtOHV; and c – MetAmV.
